# Supplementary material for: Climate-driven chemistry and aerosol feedbacks in CMIP6 Earthsystem models
Source: Copernicus journal article supplement (doi:10.5194/acp-2019-1207), 2020-02-04
Supplement: Supplementary file [file acp-2019-1207-AC1-supplement.pdf]

Responses to reviews of “Climate-driven chemistry and aerosol feedbacks in CMIP6 Earth system models” by Gillian Thornhill et al.

We would like to thank the two anonymous referees for their useful and supportive comments. Their comments are repeated below reviewer 1 in black, reviewer 2 in blue, with our responses in red.

The paper is an interesting summary of the magnitude of chemistry and aerosol feedbacks in available CMIP6 climate models. The paper is generally well-written, however in its current form the manuscript is somewhat fragmented and some important discussion about is missing. Some aspects of the methodology are described concisely, yet some important details are missing entirely, or are described only briefly. The chemical and aerosol forcing agents are considered independently which helps compartmentalise the results and some of these sections include important insights. However, other sections have not been crafted with the same care.

Thornhill et al. analyse a set of Earth System Model simulations with atmospheric chemistry and aerosol parameterisations to quantify climate feedbacks associated with aerosol and chemistry processes. The methodology allows to attribute the climate feedback to different chemical and aerosol processes and thereby provides in some cases important insights. The paper is highly relevant and fits well to the scope of ACP. The paper is generally well written, but the quality of the individual sections varies considerably.

We thank the reviewers for their positive comments. The comments regarding the fragmentation, missing discussion and individual sections are addressed in responses to specific comments below.

The paper would benefit from merging sections 4 and 5. Currently results from several CMIP6 climate models are somewhat mechanistically portrayed in section 4. Section 5 contains some context for interpreting the differences between models, but uses identical subsection headings and much of the content is more suited to the introduction of a paper on one or more of the forcing agents. The chosen format makes the manuscript unnecessarily disjointed and does not help contextualise the main results. Once sections 4 and 5 are merged, they should be revised to include discussion of the physical processes that cause differences between models. Currently, this is only achieved for one or two of the forcing agents.

I rarely recommend merging results and discussion, but I agree with reviewer #1 that in this case, where a lot of different processes are at play, it would be advisable to merge section 4 and 5 in the sense to have results and discussion for each of the different forcing agents together. The quality of the results presentation and their discussion varies substantially, and the authors should strive to be more explicit in terms of describing and explaining the important differences between models, and where possible provide an appropriate comparison to previous studies. There should then still be an overall discussion section 5/6 in the end where the overall contribution of the non-CO<sub>2</sub> chemistry and aerosol feedbacks are discussed in the light of other climate feedbacks (physical, carbon, ...).

We will merge sections 4 and 5 as suggested by both reviewers.

The article has two main themes. Firstly, the differences in aerosol and chemistry forcing efficiency and burden sensitivity are considered. Secondly, the magnitude of feedbacks from forcing agents are

contrasted. It is not clear what the authors intended the main message of the paper to be. The abstract provides very few conclusions about either of these aspects and is overly focussed on methane-specific results. If the paper is intended to focus on the second aspect, then the majority of the feedback summary tables could be moved to the SI without reducing the impact of the paper. However, I think it would be better to retain these tables and include a process-based discussion of the causes of model differences as suggested above.

The focus of the paper is on the quantification of alpha (feedback), which is the product of phi (forcing efficiency) and gamma (sensitivity to climate). Therefore, the phi and gamma terms are equally important. The focus of this paper is not a process-based discussion of model differences. Such discussions could fill whole papers themselves and are to some extent found in the model description papers. Rather the aim of this paper is to demonstrate the contribution of chemistry/aerosol feedback mechanisms to the overall climate feedback in these ESMs. This will be brought out more clearly in the abstract and introduction.

The use of standard deviations to represent uncertainty in a handful of models is not appropriate. It is possible that this is not what the authors have done, but their method is currently unclear. The authors need to clarify their multi-model uncertainty calculations in the text and if they are currently using standard deviations to represent uncertainty in only 3-6 values, need to seek more appropriate ways to communicate this information. Currently multi-model uncertainties are communicated through table captions but should be described fully in the main text.

The methods section should be expanded by a description on how the authors have dealt with uncertainty in this study. What do the reported  $\pm$  ranges represent for individual estimates, how are errors of the multi-model mean derived from these (error propagation of the IAV?), how is the error range of the total forcing estimate determined, how have varying estimates from emission/burden based methods been dealt with in the total feedback assessment.

We agree the uncertainty methodology needs to be explained fully, including how errors are propagated. This will be added.

The abstract should list the feedbacks assessed here and should be much more explicit about the major findings of this study (I would assume that this would be a summary of Figure 5). It is unclear to me why the methane effects are highlighted here, while this is not mentioned at all in the Conclusion section. In general, the authors should try to clarify the main messages from this paper in abstract, introduction and conclusions.

We realise that the overall aim of the paper was not entirely clear (see also response to reviewer 1). The abstract will be revised to make the findings explicit.

The introduction is somewhat simplistic in that it only lists studies that have attempted to assess non CO<sub>2</sub> climate feedbacks. For the general audience and the orientation of the readers it would be helpful to start with a somewhat more detailed description of the major processes and feedbacks considered here and why they matter to the climate system.

We agree this would be a useful addition to the introduction.

The choice of the authors to rely on 4xCO<sub>2</sub> experiments to diagnose climate feedback implies that some of the feedbacks considered are less climate change related, but mediated by the effect of CO<sub>2</sub> on vegetation productivity and cover. This is an important caveat that should be explained in the Methods section for those processes that do respond to CO<sub>2</sub> as well as climate. Also, this needs to be reflected critically in the Conclusions section/Abstract.

This is discussed to some extent in the text, but we agree it could be brought out in the Conclusions and Abstract.

All figures require subfigure labels as per ACP guidelines, to match references in the captions and main text.

These labels will be added.

Line 34: “with warmer temperatures” needs a fuller description. 4Xco<sub>2</sub> induced warming

L35: define warmer temperatures

Accepted: “warmer” will be defined.

L36: positive methane feedbacks?

Accepted: This will be reworded

Line 37: VOC needs to be defined.

Accepted: This will be defined.

Line 40: GCMs do these things already. ESMs include the interactions between these systems, by coupling them and hence can expect a greater degree of consistency of information across model components. This needs to be clarified in the text.

Accepted: This will be clarified in the text.

L44: consider adding Arneth et al. 2010, Nat. Geo (Doi: 10.1038/ngeo905) to this list

Accepted: This will be added.

Line 57: Here and in the conclusions, it is important to mention that some of the forcing agents considered make important climate contributions at the regions scale that are neglected when global mean temperatures are used to represent climate change.

Accepted: This will be mentioned.

L72: Briefly explain why you not just use one of the options. I also think that this question deserves more attention in the results section where you for some forcings can compare the magnitude of the alternative estimates more systematically to derive at a joint assessment of the individual feedback factor.

Accepted: The reason for using burdens or emissions will be explained.

Section 2.2: It would be helpful to know which of the feedbacks is calculated which way here. Also, given the need for standardisation here or in the discussion section, there should be a discussion about the assumption of linearity of the radiative forcing response to emissions/burden across a large range of emissions/burden.

Accepted: The discussion of feedbacks will be expanded to include discussion of linearity.

Which ensemble members were selected for this study, or does the study use an ensemble mean?

Only one ensemble member was run for each of these experiments. This will be clarified in the text.

L86: It is unclear whether this is based on simulations presented in Collins et al. 2017, or based on new AerChemMIP experiments, please clarify.

We will clarify that the analysis here is based on simulations from Collins et al. 2017.

Line 102: The scale factor is not well justified. The cited document is a substantial IPCC chapter. Presumably, authors are referring to section 8.2.3.3? Including the page number would help reader. However, the derivation of the scale factor used here is unclear and some explanatory text is required.

L102: Provide an explanation for this scaling factor rather than referencing a full IPCCchapter

Accepted: The scaling factor will be explained.

Line 105: The use of the value 9.25 also needs justification and a description of how it corresponds to values supplied in the referenced document.

L105: For completeness, give value assumed for  $M_{atm}$  as well as the molecular masses of CH<sub>4</sub> and air Section 3.1 should reference table 2 but does not. Section 3.2: natural emissions of what?

Accepted: The derivation of the methane lifetime will be explained and the physical constants listed.

Line 110: "four have . . . and three have . . ." is ambiguous. "Three of these four also have. . ." is clearer. Table 2 makes this clear, but is not currently referenced.

Accepted: This will be clarified, and table 2 referenced.

Line 119: Table 3 is currently referenced in a way that suggests it will compare emissions from all natural sources, whereas it actually shows differences between models for dust and BVOCs only. The text needs to be revised. This error is repeated on the first line of section 3.2.2.

L119: this sentence needs to be clarified. There are multiple climate-relevant land based emissions beyond dust and BVOCs. What do the authors want to state here? L134: same as L119

Accepted: The text will be reworded in lines 119 and 134.

Table 3: "PAR" needs to be defined. The phrase "Not dependent on vegetation" is redundant.

Table 3: define LAI, PAR. Given an indication what LAI varies and interactive vegetation imply. The table captions says BVOC, the header VOC, which is correct?

Accepted: LAI and PAR will be defined and the descriptions will be expanded.

Given that Section 4.2.3. discusses wetland emissions, the models used should be described here briefly as well.

Accepted: Wetland will be described as well.

Table 4: There are inconsistencies in the table. For example, sometimes "wind" is used and at other times "wind speed dependent". Descriptions here are too brief. What is the difference between DMS emission and oceanic organic aerosol complexity for NorESM2-LM and UKESM1 for example?

Table 4: what is the difference between wind dependent and wind speed?

Accepted: This table will be reworded for consistency, and descriptions expanded.

L147: Does this sentence imply all models use the same parameterisation?

This will be clarified that the implementation of Price and Rind can vary between models.

Section 4, Line 150: Section 2.1 should be referenced in the first paragraph, so that the normalization of temperatures can be put in the context of  $\gamma_i$  as defined in that section.

L151: refer back to Section 2.1 or remove as this is partly redundant. .

Accepted: We agree it would be useful to refer to section 2.1 here.

Line 155: For non-specialist readers an indication of the number of years required to reach equilibrium on average is needed.

L155: For the non-expert reader, explain how long the development of a new equilibrium takes and how large the difference on average would be

Accepted: Yes, we agree this would be useful to indicate.

Table 5: No SD?

We will add standard deviations to this table.

Line 163: Figure S1 does not obviously support this claim. Global mean ERF values should be provided for each model. Also, the authors should explicitly state they are discussing "global mean" effective radiative forcing here.

L163: Figure S1 does not separate shortwave and longwave effects to make this claim.

Accepted: LW and SW will be shown separately. A table of global mean ERFs for each model will be added to the supplement.

Line 165: The strong regional forcing over Africa should be mentioned as the primary cause of positive SW forcing. Some speculation of the process parameterisations that cause this model behavior should be given.

L165: the positive shortwave forcing OF DUST AEROSOLS? Is it possible to provide an explanation for this CNRM response?

Accepted: More explanation will be given here about the absorption values for dust in the different models.

Figure 1 (and subsequent following figures): use stippling or alike to show areas of model disagreement. Also revise figures to ensure the legend is readable without magnifying glasses

Accepted: We will add stippling and increase the size of the legend.

Line 182: Refer to table 6 again. Also, some speculation on the physical processes causing the increased lifetime should be given. This is a good example of the need for additional discussion and how merging, then adapting content from section 5 will improve the interpretation of results. Line 189: It is not clear what the 2nd use of "for instance" here is referring to. This sentence needs to be rewritten to improve clarity.

Accepted: Reference to table 6 will be added along with a comment on the physical processes. The 2<sup>nd</sup> "for instance" was a mistake and the sentence will be rewritten.

Table 6: The reason for missing values in this and other tables needs to be explained more clearly within the text.

Table 6 (and similar subsequent tables): Why are certain cells blank?

Accepted: Not all models provided all the diagnostics. This will be explained.

Line 200: These forcing values are far larger than for dust. Are the forcing-emission-feedback relationships expected to be linear? If not, there will be discrepancies in the gamma terms across emission types, even if normalised. This assumption on linearity and its implications need to be discussed here and/or in section 2.2.

A comment on the non-linearity will be added. For doubled emissions, errors introduced through assuming linearity are likely to be small compared to process uncertainty. Many studies use 5x or 10x emissions.

Line 201: Why 20x? Is this caused by the choice of size bins? This warrants some discussion. Why is the AOD of a similar magnitude? What model processes have been adjusted/tuned to make the AOD similar? The reasons models have similar values for very different reasons need to be better understood. This is important for understanding the causes of model diversity in climate projections.

L201: Why does this discrepancy occur, and how can the AOD be still similar? This paragraph should also have a discussion on why MIROC6 deviates in terms of the ERF response

This is indeed due to CNRM having a bin for larger particles (up to 20 microns) which add to the mass, but not to the AOD. This will be clarified.

Line 205 - 209: All positive except MIROC needs to be explained/considered. What regions show a decrease in emissions that causes the global mean response to be negative? Maps for each model in the SI are needed.

Accepted: Maps for each model will be provided in the supplement, and the regionality of the MIROC decrease (decrease in N. hemisphere especially N. Atlantic, just outweighs the increases in the Southern Ocean) will be described.

Line 220: It should be explained here that all models could have run the 2xdms experiment. Interactive ocean biogeochemistry is not a prerequisite, since emissions could have been scaled within the flux parameterisation as with the 2xdust experiment.

Accepted: This will be clarified.

Line 222: Fig 3 does not show the forcing values for each model as implied. Table 8 should be referenced to here.

L222: Figure 3 does not show this.

Accepted: The text will be clarified that fig 3 shows the multi-model mean. Table 8 will be referenced.

Line 222-224: Maps of sulphur concentrations and changes in concentrations need to be included as a figure in the SI for each model, so the reader has a clear understanding of the magnitude of regional compensation across models.

Accepted: These maps will be added.

Line 225: GFDL-ESM4 values only contributes to the multi-model sensitivity to emissions/concentrations, but not to the multi-model radiative efficiency. The assumption made here is that all models have similar radiative efficiencies. This is an important assumption, given the diversity of model responses highlighted up to this point in the manuscript. Is it appropriate to assume GFDL-ESM4 has the same radiative efficiency as the two models used in the sensitivity calculation? Some justification is required if the authors want to maintain this approach. An alternative approach would be to only use the 2 models with sufficient information to calculate both the multi-model sensitivity and multi-model radiative efficiency. This subjective choice to include partial information from one model needs to be justified more clearly and the implications of extrapolating the multi-model radiative efficiency to other models needs to be considered and openly discussed.

Accepted: This is a good point and both methods will be investigated.

Line 229: The magnitude of the increase should be quantified in the text.

Accepted: This will be added to the text.

Table 8: Please check values, at least the alpha emission multi model mean cannot be correct.

These values will be recalculated.

Line 249: Here and elsewhere in the text, the word "significant" is used without mention of associated statistical tests. The values should be state with "significant" removed, or the methodology more accurately described.

Accepted: This will be more accurately described.

Line 253: Incorrect label. Figure S3 only shows the multi-model mean. Given the diversity in aerosol forcing from this source, maps of CDNC should be provided for each model. Also, interpretation of the differences between models needs to be included here.

L253: Figure S4 does not exist.

Apologies for the mistake in the figure reference. CDNC will be shown for each model.

Line 253-257: Examples of regions where these behaviors are likely, with an explanation of why is needed.



This explanation will be expanded.

Figure 4: Fig S3 could be a subfigure of Fig 4.

Agreed the multi-model CDNC could fit in figure 4.

Table 9: Uncertainty values are missing for UKESM1 and multi-model mean values are missing for Scaled Mass

These will be fixed.

Section 4.2 general: I think it would be easier to follow if the indirect effects of NO<sub>x</sub> and BVOC on methane were discussed jointly and possible even in one table, as they rely on the same methodology and type of experiments.

Accepted: These will be put into the same table.

Line 278: Is there an hypothesis the authors could provide to explain the causes of model diversity in BVOC partitioning into ozone and aerosol forcing? This sort of discussion is essential to develop a better understanding of the importance model differences and will affect interpretation of climate feedbacks across models.

This isn't a partitioning as such as the production of ozone and SOA are through very different mechanisms. The ozone responses are similar (in DU per Tg/yr VOC), but the SOA varies more. Some discussion will be added on why the models might differ.

L279: BVOC-related aerosols, or aerosols in general?

This will be clarified that this relates to the aerosols from BVOC changes.

L281: refer back to Section 2.2.

Accepted: A reference to section 2.2 will be added.

Table 10: There is no explanation of why 14% is used. This should be in the methods section, not hidden in a caption.

A justification of the radiative efficiency uncertainty will be provided in the main text.

L297: Methane Burden/Emissions? does not change

Methane concentration does not change. This will be clarified.

Line 300-302: This sentence needs to be rewritten to improve readability.

This will be rewritten.

Line 302: It is not clear from the text as written, how BVOC burden sensitivities are used in the methane sensitivity calculation.

This will be clarified – it is sensitivity of methane lifetime to BVOC emission in the 2xVOC experiment.

L304: The 0.015 Wm<sup>-2</sup> %<sup>-1</sup> are not described in Section 2.2. but should be

Accepted: These will be described in section 2.2

Section 4.2.4: The title of this section is misleading. Several non-emission drivers are considered, not just these two.

This will be clarified to be “Meteorological Drivers”

Line 265: “1” missing from UKESM1.

This will be corrected.

Section 4.2.3 I find this section troublesome given the lack of explanation of the simulated methane emissions, particular because this presentation confounds the direct effects of CO<sub>2</sub> on methane emissions (via CO<sub>2</sub> fertilisation of wetlands) with the direct effects of temperature on methane-emissions, but exclusively attributes this to temperature. The result of which is an inflated methane-emission climate feedback compared to Ciais et al. 2013. I wonder whether there are simulations with interactive methane but no biogeochemical coupling to CO<sub>2</sub> available from the C4MIP project that would allow to tackle this separation? As a minimum, this confounding effect needs to be explained and discussed.

Unfortunately there are no radiation-only 4xCO<sub>2</sub> simulations. The effects will be explained and discussed.

Table 14: What is the justification to assume at 14% uncertainty on methane radiative efficiency?  
Section 4.2.4 should be labelled atmospheric temperature and water vapour?

This will be justified (see also review 1 comment on table 10).

L356: the residual is then ASSUMED TO BE the direct effect. This statement could be backed up by a brief explanation that BVOC and NO<sub>x</sub> are the only agents affecting ozone and methane lifetimes next

to climate in these models. Otherwise, it should be explained why other factors may be small and negligible.

Accepted: A brief explanation will be given.

L367: Consistently use CESM-WACCM

Accepted: We will check for naming consistency.

Section 4.3: This section needs some comment about the importance of climate forcing agents that have climatic importance at the regional scale, to prevent the results of this manuscript being interpreted incorrectly.

The focus of the paper is on the global radiative feedback per K, but we agree that it would be useful to clarify that there could be regional responses to a global forcing.

Section 4.3: Figure 5 is not referenced. The text needs to be explicit that the feedbacks are the multi-model mean, and that not all feedbacks could be calculated for all processes considered. A discussion that I have been missing here is whether these terms are really additive and linear as assumed. It is possible that there is a compensation of feedbacks between models, so I wonder whether it would be possible / interesting to compare the sum of feedbacks across processes for those models that have calculated similar feedbacks

It is not obvious that there would be significant lack of additivity given these are small changes in composition, however we will add a discussion.

Line 380: The authors need to specify that these are multi-model feedbacks, here and in the table caption. Figure 5 needs to be referenced. In addition, the cancellation between models with opposite signs again needs to be mentioned within this section, as does the fact that a different number of models were used to calculate the multimodel means because of data availability.

These are all good points and will be implemented.

Figure 5: use consistent labelling of models. use consistent labelling of forcing factors (e.g. total non-CH<sub>4</sub>, wetland CH<sub>4</sub> etc.) Use a clearer abbreviation for lightning NO<sub>x</sub> than INO<sub>x</sub>. The figure caption should also explain, how and why feedbacks from table 16 were aggregated in the figure.

Accepted: The labelling and caption will be improved.

Line 402: Can the feedbacks be interpreted in the context of the magnitude of forcing from these forcing agents over some specified period? Uncertainty in these magnitudes should be included in the discussion with appropriate references.

The forcing responses are maintained continuously rather than being for a specific period.

Line 423: There is no use citing these values if not directly comparable. This text should be removed to avoid confusion. Further discussion of the causes of model differences is required here.

Section 5.2 is not helpful as no guidance is given as to the origin of the large range in the estimates and the plausibility of the different model projections. The comparison to the literature numbers is insufficient in that the numbers aren't directly comparable. This section needs substantial revision.

This will be rewritten to discuss what comparisons are available.

Line 433: Please clarify the difference between primary production and DMS production in the text.

Accepted: This will be clarified.

Section 5.6 response to my previous comment, but then implies that this shouldn't really be listed here as a climate feedback, but a biogeochemical carbon-methane feedback.

We describe this here as an "adjustment", but we agree we need to make it more explicit in the methods and conclusions that it is not necessarily a feedback.

Section 6: I would have liked to see a somewhat more broader discussion of the feedbacks derived here in the context of physical and other biogeochemical feedbacks, as for instance summarized in Ciais et al. 2013.

Accepted: We will expand section 6 to include more context.

L500: This is an important caveat that should not be left as a foot note in the conclusion section, as it is a fundamental problem of the approach. I strongly recommend to be more explicit about this in the Methods section, where relevant in Section 4 as well as specifically in the presentation of Figure 5 and Table 16.

Accepted: As with the section 5.6 comment a discussion of "adjustments" will be made more explicit in the Methods.

L503: This is a point worth discussing more. Are the feedbacks non-linear and therefore we expect them to be larger/smaller when looking at the difference between present-day and 4xCO<sub>2</sub>?

The choice of base state is likely to be important for the forcing efficiencies. We might expect aerosol forcing to be less efficient and ozone production more efficient in the present day. A discussion of this will be added.

Line 505: This value needs context to aid interpretation. e.g. What is this as a proportion of the GHG forcing required to increase temperatures by 1 degree?

Good point: We will add a comparison to the total climate feedback  $\sim -1.25 \text{ W/m}^2/\text{K}$  and climate sensitivity.

L505 and 507: The uncertainties given are the SD of sum of the multi-model mean feedback components, but there are larger uncertainties in the derivation of these feedback that should be discussed and acknowledged.

Line 507-508: The uncertainties in these values are substantial and need to be included in this discussion and interpretation of results.

Accepted: The discussion of the uncertainties will be expanded.

SI: S1, some descriptions are missing entirely and need to be included.

These will be added.

SI: All figures require subfigure labels.

These will be added.

Data availability: It would be helpful if the authors would list the exact names of the experiments used, including an indication of the ensemble members selected Please carefully edits and update Table S1

Table S1 will be expanded to include this information.
